# Supplementary material for: Spiropyrimidinetriones: a Class of DNA Gyrase Inhibitors with Activity against Mycobacterium tuberculosis and without Cross-Resistance to Fluoroquinolones
Source: PubMed Central journal article supplement (PMC9017349; doi:10.1128/aac.02192-21), 2022-03-10
Supplement: aac.02192-21-s0001.pdf [file aac.02192-21-s0001.pdf]

Supplemental Material:

Spiropyrimidinetriones: a class of DNA gyrase inhibitors with activity against Mycobacterium tuberculosis and without cross-resistance to fluoroquinolones

Gregory S. Basarab<sup>a,b</sup>, Sandeep Ghorpade<sup>b</sup>, Liezl Gibhard<sup>a</sup>, Rudolf Mueller<sup>b</sup>, Mathew Njoroge<sup>a</sup>, Nashied Peton<sup>b</sup>, Preshend Govender<sup>b</sup>, Lisa M Massoudi<sup>c</sup>, Gregory Thomas Robertson<sup>c</sup>, Anne J. Lenaerts<sup>c</sup>, Helena Ingrid Boshoff<sup>d</sup>, Douglas Joerss<sup>e</sup>, Tanya Parish<sup>e</sup>, Thomas F. Durand-Reville<sup>f</sup>, Manos Perros<sup>f</sup>, Vinayak Singh<sup>b,g</sup>, Kelly Chibale<sup>b,g</sup>

**Affiliations:**

<sup>a</sup>Drug Discovery and Development Centre (H3D), Old Main Building Groote Schuur Hospital, University of Cape Town, Observatory, Cape Town, 7935, South Africa

<sup>b</sup>Drug Discovery and Development Centre (H3D), Department of Chemistry, University of Cape Town, Rondebosch 7701, South Africa

<sup>c</sup>Mycobacteria Research Laboratories, Department of Microbiology, Immunology and Pathology, 200 West Lake Street, Colorado State University, Fort Collins, CO 80523-1682, USA

<sup>d</sup>Tuberculosis Research Section, National Institute of Allergy and Infectious Diseases, Bethesda, Maryland 20892, USA

<sup>e</sup>Infectious Disease Research Institute, 1616 Eastlake Ave E, Seattle, WA 98102, USA and Center for Global Infectious Disease, Seattle Children's Research Institute, 307 Westlake Ave N, Seattle, 98101, USA

<sup>f</sup>Entasis Therapeutics, Inc., 35 Gatehouse Drive, Waltham, Massachusetts 02451, USA

<sup>g</sup>South African Medical Research Council Drug Discovery and Development Research Unit, Department of Chemistry and Institute of Infectious Disease and Molecular Medicine, University of Cape Town, Rondebosch 7701, South Africa

**Corresponding Authors:** Address correspondence to Gregory S. Basarab ([greg.basarab@uct.ac.za](mailto:greg.basarab@uct.ac.za)) and Kelly Chibale ([kelly.chibale@uct.ac.za](mailto:kelly.chibale@uct.ac.za))

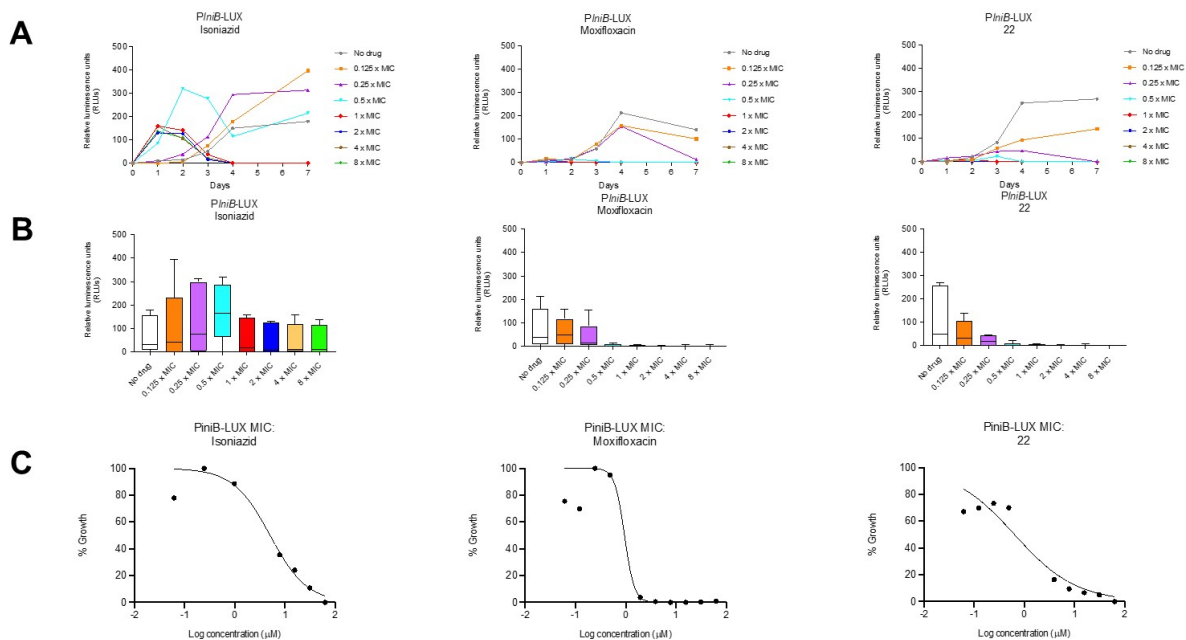

**Figure S1:** Compound **22** does not affect *Mycobacterium tuberculosis* (*Mtb*) cell wall biosynthesis. (A) Luminescence produced by H37Rv containing a modified *IniB* promoter (that drives the expression of cell wall damage-inducible genes) over 7 days of Isoniazid, Moxifloxacin and **22**. (B) Luminescence range produced (over 7 days) for each concentration of Isoniazid, Moxifloxacin and **22**. (C) MIC determination for Moxifloxacin, Isoniazid **22** against H37Rv (*IniB*) over 7 days.

**Table S1:** Concentrations of **22** in plasma collected from *Mtb* infected BALB/c mice.

| Treatment                          | Mouse | Time point (hr post dose) | Found Concentration (ng/mL) | Average Conc. Found (ng/mL) |
|------------------------------------|-------|---------------------------|-----------------------------|-----------------------------|
| Compound <b>22</b><br>300 mg/kg QD | A     | 1                         | 229000                      | 165000                      |
|                                    | B     | 1                         | 117000                      |                             |
|                                    | C     | 1                         | 148000                      |                             |
|                                    | D     | 24                        | 879                         | 6100                        |
|                                    | E     | 24                        | 994                         |                             |
|                                    | F     | 24                        | 16300                       |                             |

**Table S2:** Moxifloxacin and ethambutol in the acute mouse model of *Mtb* infection.

| Group              | Dose (mg/kg) | Days <sup>a</sup> | Bacterial burden in lung ( $\log_{10}$ CFU $\pm$ SEM) | <i>n</i> <sup>b</sup> |
|--------------------|--------------|-------------------|-------------------------------------------------------|-----------------------|
| Infection control  |              | 1                 | 2.86 $\pm$ 0.03                                       | 3/3                   |
| Start of treatment |              | 7                 | 4.16 $\pm$ 0.04                                       | 5/5                   |
| Untreated          |              | 21                | 6.51 $\pm$ 0.20                                       | 6/6                   |
| Moxifloxacin       | 100          | 21                | < 1.67 $\pm$ 0.06                                     | 3/6                   |
| Ethambutol         | 100          | 21                | 4.15 $\pm$ 0.02                                       | 5/5                   |

<sup>a</sup> Days post aerosol infection

<sup>b</sup> *n*, number of mice showing viable bacteria above the lower limit of detection (1.57  $\log_{10}$  CFU) at time of sacrifice/total number of animals tested
